# Supplementary material
Source: HighWire-hosted journal article supplement (http://www.cmaj.ca/highwire/filestream/58298/field_highwire_adjunct_files/3/resp-falagas-4-at.pdf)

**Appendix 4:** Odds ratio of the effectiveness of respiratory fluoroquinolones compared with other antibiotics for the treatment of community-acquired pneumonia by type of funding of the study.

Review: Fluoroquinolones in CAP  
 Comparison: 01 Clinical success  
 Outcome: 24 Funding of the study CE

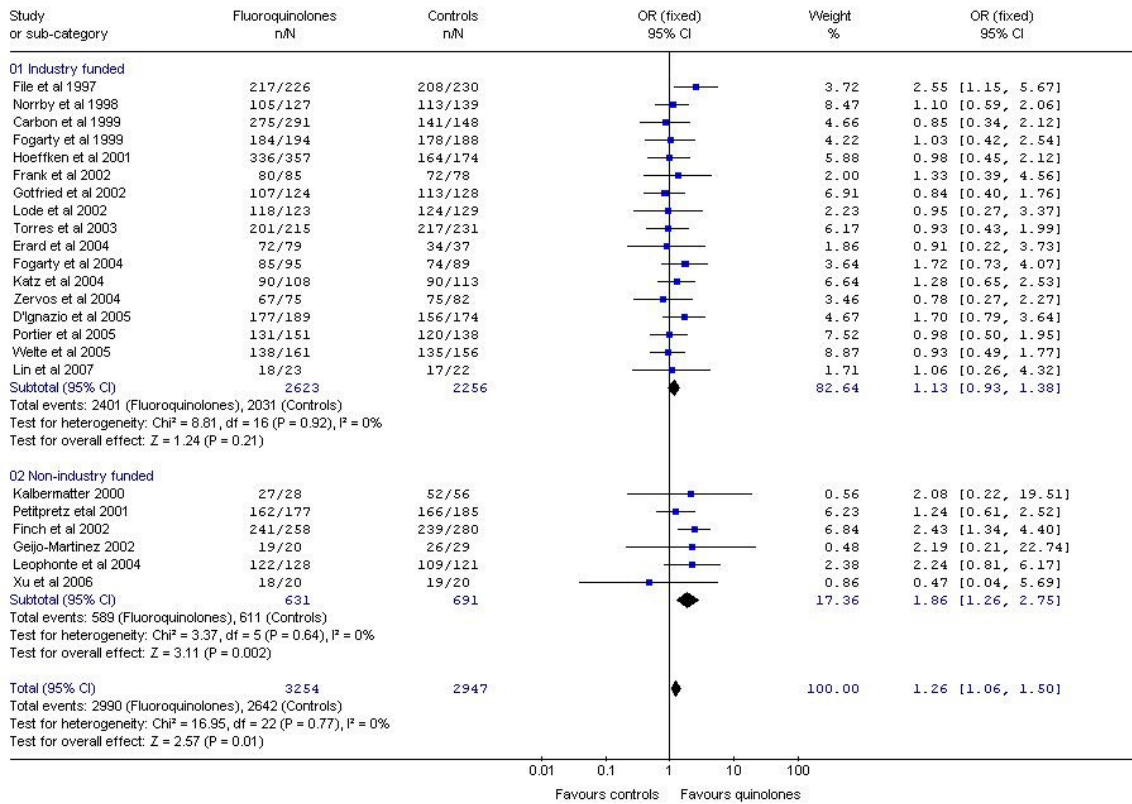

Supplement: resp-falagas-4-at.pdf [file resp-falagas-4-at.pdf]
